# Supplementary material for: Effects of nitrogen deposition on growing-season soil methane sinkacross global forest biomes
Source: Copernicus journal article supplement (doi:10.5194/bg-2019-29), 2019-02-19
Supplement: Supplementary file 1 [file bg-2019-29-supplement.pdf]

## Supplementary information (Table S1)

Effects of nitrogen deposition on growing-season soil methane sink across global forest biomes

Enzai Du<sup>1,2\*</sup>, Nan Xia<sup>2</sup>, Wim de Vries<sup>3,4</sup>

<sup>1</sup>State Key Laboratory of Earth Surface Processes and Resource Ecology, Faculty of Geographical Science, Beijing Normal University, Beijing100875, China

<sup>2</sup>School of Natural Resources, Faculty of Geographical Science, Beijing Normal University, Beijing100875, China

<sup>3</sup>Wageningen University and Research, Environmental Research, PO Box 47, NL-6700 AA Wageningen, the Netherlands

<sup>4</sup>Wageningen University and Research, Environmental Systems Analysis Group, PO Box 47, NL-6700 AA Wageningen, the Netherlands

\**Corresponding author*: Enzai Du, TEL: +86-58808085, E-mail address: enzaidu@bnu.edu.cn

Table S1. Information on location, climate, forest type, and design of manipulated N addition experiments in forest ecosystems.

| ID | Lon     | Lat   | MAT<br>(°C) | MAP<br>(mm) | GSMT<br>(°C) | GSMP<br>(mm mon <sup>-1</sup> ) | Forest type | N forms                              | N additions<br>(kg N ha <sup>-1</sup> yr <sup>-1</sup> ) | Reference                              |
|----|---------|-------|-------------|-------------|--------------|---------------------------------|-------------|--------------------------------------|----------------------------------------------------------|----------------------------------------|
| 1  | -148.30 | 64.75 | -2.8        | 284         | 14.0         | 51                              | BF          | NH <sub>4</sub> NO <sub>3</sub>      | 0, 171                                                   | Gulledge and Schimel,2000              |
| 2  | -148.30 | 64.75 | -2.8        | 284         | 14.0         | 51                              | BF          | NH <sub>4</sub> NO <sub>3</sub>      | 0, 143                                                   | Gulledge and Schimel,2000              |
| 3  | 25.62   | 61.32 | -3.3        | 680         | 15.3         | 69                              | BF          | NH <sub>4</sub> NO <sub>3</sub>      | 0, 200                                                   | Maljanen et al., 2006                  |
| 4  | 121.51  | 50.83 | -5.4        | 580         | 14.3         | 104                             | BF          | NH <sub>4</sub> NO <sub>3</sub>      | 0,10,20,40                                               | Xu et al., 2014                        |
| 5  | 121.88  | 50.42 | -5.4        | 500         | 13.5         | 111                             | BF          | NH <sub>4</sub> Cl/KNO <sub>3</sub>  | 0,10,40                                                  | Gao et al., 2013                       |
| 6  | 128.89  | 47.18 | -0.3        | 676         | 15.9         | 109                             | TF          | NH <sub>4</sub> NO <sub>3</sub>      | 0,20,40, 80                                              | Song et al., 2017                      |
| 7  | 141.33  | 43.10 | 9.5         | 995         | 17.9         | 95                              | TF          | NH <sub>4</sub> NO <sub>3</sub>      | 0,50                                                     | Kim et al., 2012                       |
| 8  | -72.19  | 42.52 | 3.5         | 1120        | 16.3         | 99                              | TF          | NH <sub>4</sub> NO <sub>3</sub>      | 0,37,120                                                 | Stuedler et al., 1989                  |
| 9  | -72.19  | 42.52 | 3.5         | 1120        | 16.3         | 99                              | TF          | NH <sub>4</sub> NO <sub>3</sub>      | 0,37,120                                                 | Stuedler et al., 1989                  |
| 10 | 127.78  | 42.52 | 2.7         | 872         | 15.5         | 116                             | TF          | NH <sub>4</sub> NO <sub>3</sub>      | 0,50                                                     | Chen et al., 2017                      |
| 11 | 127.78  | 42.52 | 2.7         | 872         | 15.5         | 116                             | TF          | NH <sub>4</sub> NO <sub>3</sub>      | 0,50                                                     | Chen et al., 2017                      |
| 12 | -85.40  | 42.40 | 9.7         | 890         | 18.9         | 91                              | TF          | NH <sub>4</sub> NO <sub>3</sub>      | 0, 10, 30                                                | Ambus and Robertson,2006               |
| 13 | -85.40  | 42.40 | 9.7         | 890         | 18.9         | 91                              | TF          | NH <sub>4</sub> NO <sub>3</sub>      | 0,10,30                                                  | Ambus and Robertson,2006               |
| 14 | -85.40  | 42.40 | 9.7         | 890         | 18.9         | 91                              | TF          | NH <sub>4</sub> NO <sub>3</sub>      | 0,100                                                    | Suwanwaree and Robertson,2005          |
| 15 | 128.10  | 42.40 | 4.1         | 855         | 15.4         | 111                             | TF          | NH <sub>4</sub> Cl/KNO <sub>3</sub>  | 0,45                                                     | Xu et al., 2011                        |
| 16 | -80.03  | 41.60 | 9.8         | 1125        | 17.3         | 107                             | TF          | NH <sub>4</sub> NO <sub>3</sub>      | 0,100                                                    | Chan et al., 2005                      |
| 17 | -74.58  | 39.92 | 12.3        | 1143        | 20.4         | 100                             | TF          | NH <sub>4</sub> NO <sub>3</sub>      | 0,50,67                                                  | Aronson et al., 2012                   |
| 18 | 116.08  | 40.06 | 11.6        | 630         | 19.2         | 95                              | TF          | NH <sub>4</sub> NO <sub>3</sub>      | 0,50,100,150                                             | Wang, 2012                             |
| 19 | 115.06  | 26.74 | 17.9        | 1505        | 17.9         | 125                             | SF          | NH <sub>4</sub> Cl/NaNO <sub>3</sub> | 0,40,120                                                 | Li et al., 2015                        |
| 20 | 118.70  | 32.18 | 15.5        | 1020        | 15.5         | 85                              | SF          | NH <sub>4</sub> NO <sub>3</sub>      | 0,50,100,150                                             | Hu et al., 2011                        |
| 21 | 110.45  | 31.60 | 10.6        | 1650        | 10.6         | 138                             | SF          | NH <sub>4</sub> NO <sub>3</sub>      | 0,50                                                     | Pan, 2013                              |
| 22 | 112.17  | 23.17 | 21          | 1927        | 21           | 161                             | SF          | NH <sub>4</sub> NO <sub>3</sub>      | 0,50,100,150                                             | Zhang et al., 2008; Zheng et al., 2016 |
| 23 | 112.17  | 23.17 | 21          | 1927        | 21           | 161                             | SF          | NH <sub>4</sub> NO <sub>3</sub>      | 0,50,100,150                                             | Zhang et al., 2008; Zheng et al., 2016 |
| 24 | 112.17  | 23.17 | 21          | 1927        | 21           | 161                             | SF          | NH <sub>4</sub> NO <sub>3</sub>      | 0,50,100,150                                             | Zhang et al., 2008; Zheng et al., 2016 |
| 25 | 112.83  | 22.57 | 22.5        | 1534        | 22.5         | 128                             | SF          | NH <sub>4</sub> NO <sub>3</sub>      | 0,50,100                                                 | Zhang et al., 2012                     |

Note: MAT, MAP, GSMT and GSMP indicate mean annual temperature, mean annual precipitation, growing-season mean temperature, and growing-season mean monthly precipitation, respectively. BF, TF, and SF indicate boreal forest, temperate forest, and subtropical forest, respectively.

## Reference

- Ambus, P., Robertson, G.P. 2006. The effect of increased N deposition on nitrous oxide, methane and carbon dioxide fluxes from unmanaged forest and grassland communities in Michigan. *Biogeochemistry*, 79(3), 315-337.
- Aronson, E.L., Vann, D.R., Helliher, B.R. 2012. Methane flux response to nitrogen amendment in an upland pine forest soil and riparian zone. *Journal of Geophysical Research: Biogeosciences*, 117, G03012.
- Chan, A.S., Steudler, P.A., Bowden, R.D., Gullede, J., Cavanaugh, C.M. 2005. Consequences of nitrogen fertilization on soil methane consumption in a productive temperate deciduous forest. *Biology and fertility of soils*, 41(3), 182-189.
- Chen, Z., Setälä H., Geng, S., et al. 2017. Nitrogen addition impacts on the emissions of greenhouse gases depending on the forest type: a case study in Changbai Mountain, Northeast China. *Journal of Soils and Sediments*, 17(1), 23-34.
- Gao, W.L., Cheng, S.L., Fang, H.J., et al. 2013. Early responses of soil CH<sub>4</sub> uptake to increased atmospheric nitrogen deposition in a cold-temperate coniferous forest. *Acta Ecologica Sinica*, 2013, 3(23), 7505-7515.
- Gullede, J., Schimel, J.P. 2000. Controls on soil carbon dioxide and methane fluxes in a variety of taiga forest stands in interior Alaska. *Ecosystems*, 3, 269-282.
- Hu, Z.H., Zhang, H., Chen, S.T., Li, Q., Li, M.H., Shen, S.H. 2011. Effects of simulated nitrogen deposition on N<sub>2</sub>O and CH<sub>4</sub> fluxes of soil in forest belt. *China Environmental Science*, 31(6), 892-897.
- Kim, Y. S., Imori, M., Watanabe, M., Hatano, R., Yi, M. J., Koike, T. 2012. Simulated nitrogen inputs influence methane and nitrous oxide fluxes from a young larch plantation in northern Japan. *Atmospheric Environment*, 46, 36-44.
- Li, X., Cheng, S., Fang, H., et al. 2015. The contrasting effects of deposited NH<sub>4</sub><sup>+</sup> and NO<sub>3</sub><sup>-</sup> on soil CO<sub>2</sub>, CH<sub>4</sub> and N<sub>2</sub>O fluxes in a subtropical plantation, southern China. *Ecological Engineering*, 85, 317-327.
- Maljanen, M., Jokinen H., Saari, A., Strommer, R., Martikainen, P.J. 2006. Methane and nitrous oxide fluxes, and carbon dioxide production in boreal forest soil fertilized with wood ash and nitrogen. *Soil Use and Management*, 22, 151-157.
- Pan, D.R. 2013. Study on greenhouse gas emission for grassland soil below different forest soils under precipitation reduction and Nitrogen deposition in Shennongjia mountain. Gansu Agricultural University, Master's thesis.

- Song, L., Tian, P., Zhang, J., Jin, G. 2017. Effects of three years of simulated nitrogen deposition on soil nitrogen dynamics and greenhouse gas emissions in a Korean pine plantation of northeast China. *Science of the Total Environment*, 609, 1303-1311.
- Stuedler, P.A., Bowden, R.D., Melillo, J.M., Aber, J.D. 1989. Influence of nitrogen fertilization on methane uptake in temperate forest soils. *Nature*, 341(6240), 314-316.
- Suwanwaree, P., Robertson, G.P. 2005. Methane oxidation in forest, successional, and no-till agricultural ecosystems. *Soil Science Society of America Journal*, 69(6), 1722-1729.
- Wang, R.N. 2012. Effects of simulated atmospheric nitrogen deposition on the exchange fluxes of greenhouse gases in the temperate forest soil. Beijing Forestry University, Master's thesis.
- Xu, X., Han, L., Luo, X., Han, S. 2011. Synergistic effects of nitrogen amendments and ethylene on atmospheric methane uptake under a temperate old-growth forest. *Advances in Atmospheric Sciences*, 28(4), 843-854.
- Xu, M., Cheng, S., Fang, H., et al. 2014. Low-level nitrogen addition promotes net methane uptake in a boreal forest across the Great Xing'an mountain region, China. *Forest Science*, 60(5), 973-981.
- Zhang, W., Mo, J., Zhou, G., et al. 2008. Methane uptake responses to nitrogen deposition in three tropical forests in southern China. *Journal of Geophysical Research: Atmospheres*, 113, D11116.
- Zhang, W., Zhu, X., Liu, L., et al. 2012. Large difference of inhibitive effect of nitrogen deposition on soil methane oxidation between plantations with N-fixing tree species and non-N-fixing tree species. *Journal of Geophysical Research: Biogeosciences*, 117, G00N16.
- Zheng, M., Zhang, T., Liu, L., Zhang, W., Lu, X., Mo, J. 2016. Effects of nitrogen and phosphorus additions on soil methane uptake in disturbed forests. *Journal of Geophysical Research: Biogeosciences*, 121(12), 3089-3100.
